# Supplementary material for: Dynamic Rainfall Erosivity Estimates Derived from GPM IMERG data
Source: Copernicus journal article supplement (doi:10.5194/egusphere-2022-1315), 2023-02-06
Supplement: Supplementary file 1 [file egusphere-2022-1315-supplement.zip]

Archive with 2 entries (2 files):
- Emberson_2022_IMERG_rainfall_erosivity_HESS_SUPPLEMENT.pdf
- Erosivity_raster_files.zip
